# Supplementary material for: Towards understanding the effects of carbon and nitrogen-doped carbon coating on the electrochemical performance of Li4Ti5O12 in lithium ion batteries: a combined experimental and theoretical study
Source: Royal Society of Chemistry journal article supplement (doi:10.1039/c1cp21513b), 2011-01-01
Supplement: c1cp21513b.pdf [file c1cp21513b.pdf]

## Supporting Information for

# Towards understanding the effects of carbon and nitrogen-doped carbon coating on electrochemical performance of $\text{Li}_4\text{Ti}_5\text{O}_{12}$ in Lithium ion batteries: a combined experimental and theoretical study

Zijing Ding,<sup>1</sup> Liang Zhao,<sup>1</sup> Liumin Suo, Yang Jiao, Sheng Meng,\* Yong-Sheng Hu,\* Zhaoxiang Wang, Liquan Chen

Beijing National Laboratory for Condensed Matter Physics, Institute of Physics, Chinese Academy of Sciences, Beijing 100190, China. E-mail: yshu@aphy.iphy.ac.cn; smeng@aphy.iphy.ac.cn

<sup>1</sup>These authors contribute equally to this work.

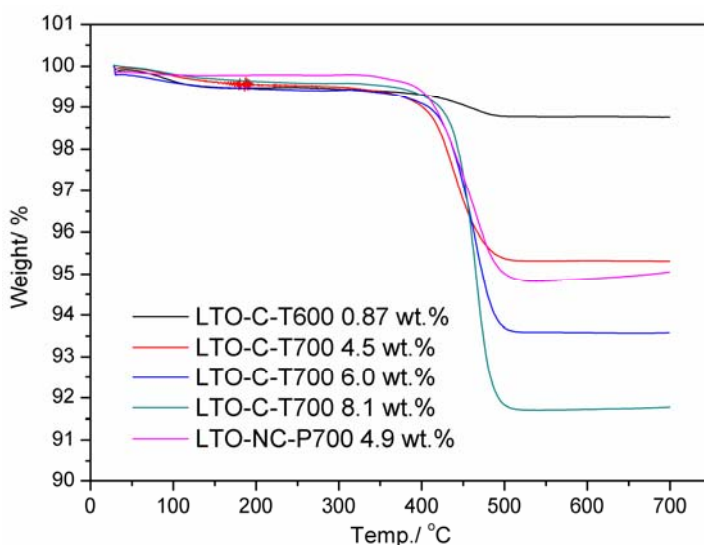

Figure S1 TG curves of carbon and N-doped carbon-coated LTO samples by a CVD method..

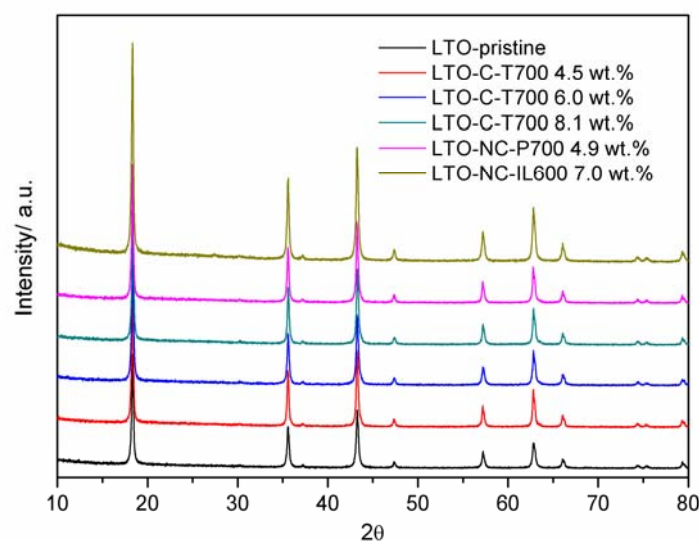

Figure S2 XRD patterns of carbon-coated LTO with different carbon contents.

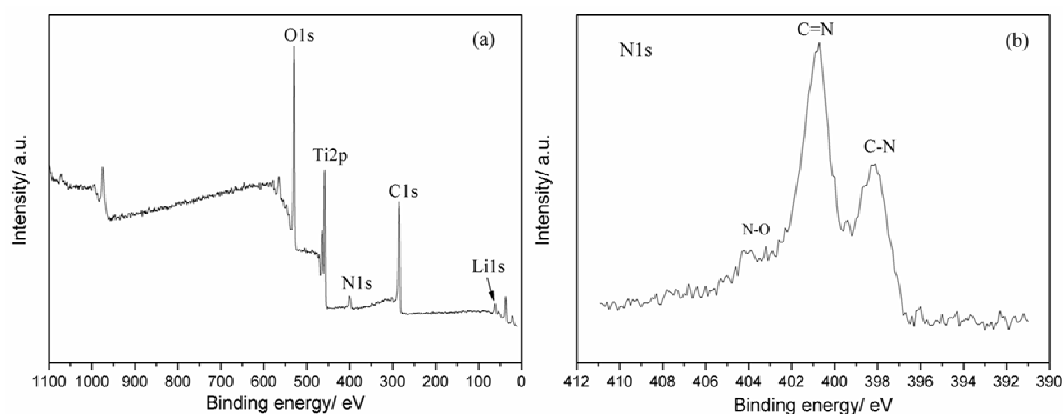

Figure S3 XPS survey spectrum of the LTO-NC-P700 sample (a) and its high resolution spectrum of N1s (b).

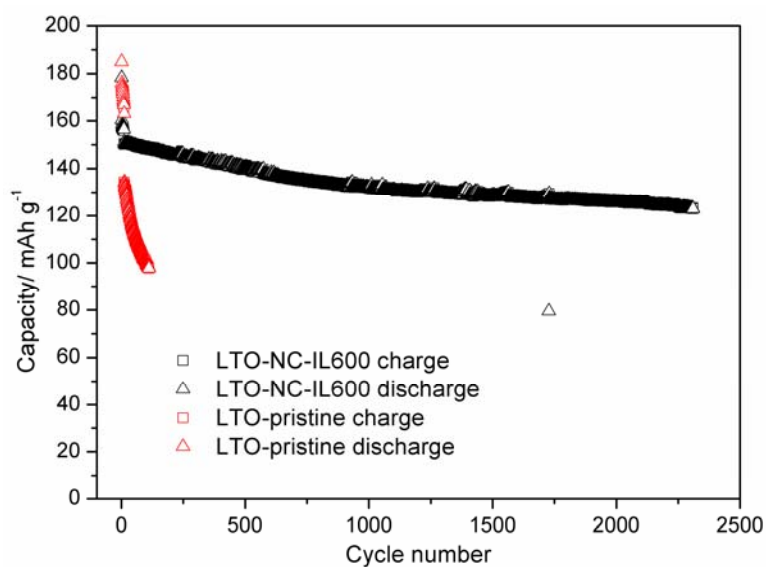

Figure S4 Cycling performance of N-doped carbon-coated LTO and pristine LTO.

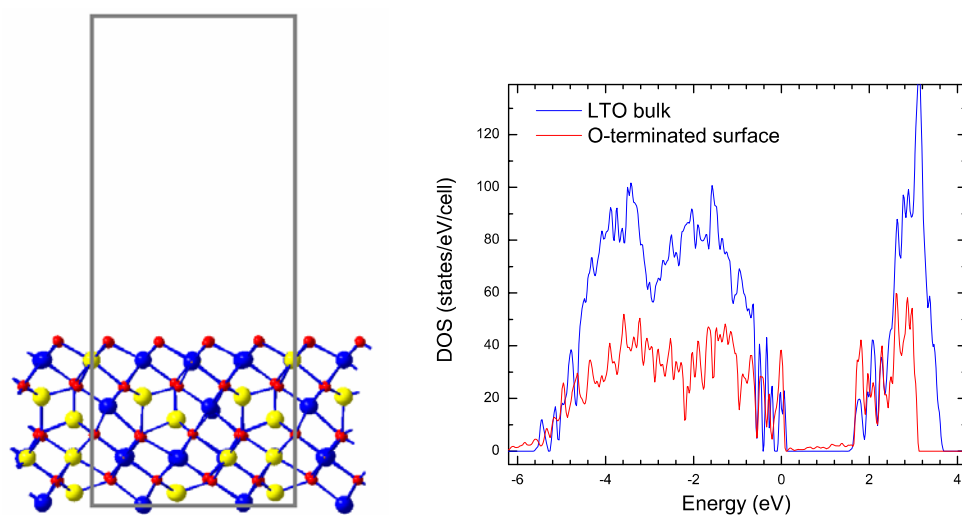

Figure S5 (Left) Atomic structure of O-terminated LTO(111) surface. (Right) Density of states (DOS) of bulk LTO (blue curve) and the DOS of O-terminated LTO (111) surface. The Fermi level is set to zero.

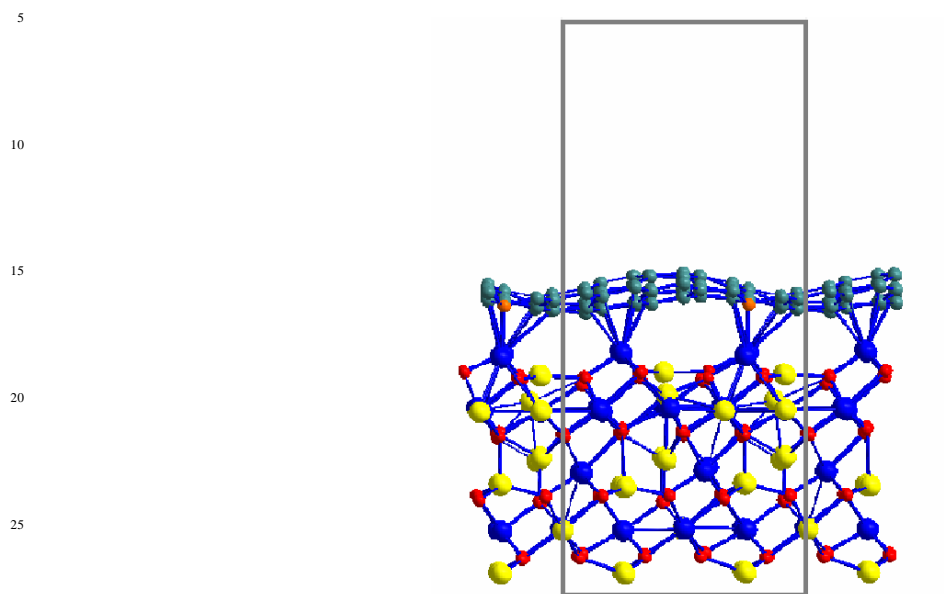

30 Figure S6 Side view of an N doped (3.2 wt.%) graphene-coating layer adsorbed on the Ti-terminated LTO surface. The gray rectangle represents the unitcell used in the calculations.
